1 **Exploring the relationships between autozygosity, educational attainment, and cognitive**  
2 **ability in a contemporary, trans-ancestral American sample**

3

4 Sarah MC Colbert<sup>1</sup>, Matthew C Keller<sup>2,3</sup>, Arpana Agrawal<sup>1</sup>, Emma C Johnson<sup>1</sup>

5

6 <sup>1</sup>Department of Psychiatry, Washington University School of Medicine, Saint Louis, MO

7 <sup>2</sup>Department of Psychology, University of Colorado Boulder, Boulder, CO

8 <sup>3</sup>Institute for Behavioral Genetics, University of Colorado Boulder, Boulder, CO

9

10

11 *Corresponding author:* Sarah MC Colbert

12 Email: sarah.colbert@wustl.edu

13

14 *Running head:* Autozygosity and educational attainment

15

16

17

18

19

20

21

22

23

24

25

26

27 **Abstract**

28           Previous studies have found significant associations between estimated autozygosity -  
29 the proportion of an individual's genome contained in homozygous segments due to distant  
30 inbreeding - and multiple traits, including educational attainment (EA) and cognitive ability. In  
31 one study, estimated autozygosity showed a stronger association with parental EA than the  
32 subject's own EA. This was likely driven by parental EA's association with mobility: more  
33 educated parents tended to migrate further from their hometown, therefore choosing more  
34 genetically diverse partners. We examined the associations between estimated autozygosity,  
35 cognitive ability, and parental EA in a contemporary sub-sample of adolescents from the  
36 Adolescent Brain and Cognitive Development Study<sup>SM</sup> (ABCD Study<sup>®</sup>) (analytic N=6,504). We  
37 found a negative association between autozygosity and child cognitive ability consistent with  
38 previous studies, while the associations between autozygosity and parental EA were in the  
39 expected direction of effect (with greater levels of autozygosity being associated with lower EA)  
40 but the effect sizes were significantly weaker than those estimated in previous work. We also  
41 found a lower mean level of autozygosity in the ABCD sample compared to previous  
42 autozygosity studies, which may reflect overall decreasing levels of autozygosity over  
43 generations. Variation in migration and mobility patterns in the ABCD study compared to other  
44 studies may explain the pattern of associations between estimated autozygosity, EA, and  
45 cognitive ability in the current study.

46  
47 *Key words:* runs of homozygosity, autozygosity, educational attainment, assortative mating,  
48 cognitive ability

49

## 50 Introduction

51 Runs of homozygosity (ROHs) are stretches of DNA that are identical by descent  
52 (Wright, 1922); these arise when an individual's parents share a distant common ancestor.  
53 While greater numbers of and longer ROHs tend to be associated with more recent inbreeding  
54 (e.g., cousin-cousin inbreeding), ROHs occur even in seemingly outbred populations (McQuillan  
55 et al., 2008). Previous studies have found that individuals with a greater level of autozygosity  
56 ( $F_{ROH}$ ; the proportion of the genome contained in ROHs) tend to have lower values on fitness-  
57 related traits, such as cognitive ability (Howrigan et al., 2016; Joshi et al., 2015), respiratory  
58 function (e.g., forced expiratory volume; Johnson et al., 2018; Joshi et al., 2015), and  
59 reproductive characteristics such as number of offspring (Clark et al., 2019; Johnson et al.,  
60 2018; Yengo et al., 2017). This phenomenon, known as inbreeding depression, suggests that  
61 these traits have been under selection pressures over evolutionary time, biasing the genetic  
62 variants that influence those traits towards being rare and recessive.

63 ROHs have been used to examine evolutionary hypotheses about quantitative traits  
64 (e.g., cognitive performance) and case-control phenotypes (e.g., psychiatric diagnoses). For  
65 example, multiple studies have shown that increased autozygosity is associated with decreased  
66 cognitive ability (Abdellaoui et al., 2015; Howrigan et al., 2016), consistent with the hypothesis  
67 that genetic variants that negatively impact cognitive ability have been under directional  
68 selection pressures and are more likely to be rare and recessive, and thus exert their effects in  
69 regions of homozygosity. Associations have been less consistent for case-control phenotypes  
70 such as schizophrenia (Johnson et al., 2016; Keller et al., 2012), potentially due to  
71 ascertainment differences in cases and controls and/or sociodemographic factors that may play  
72 a role in assortative mating (Abdellaoui et al., 2013; Clark et al., 2019). To adequately account  
73 for these potential confounding factors requires familial data—either parent-offspring or sibling  
74 (Clark et al., 2019; Johnson et al., 2018)—but this type of familial phenotypic and genotypic data  
75 is rarely available in large enough samples to achieve adequate statistical power.

76 Abdellaoui et al. demonstrated the utility of including both parental and offspring  
77 phenotypes in ROH analyses in a 2015 study where they found a stronger negative association  
78 between the offspring's autozygosity and *parental* educational attainment (EA) ( $p < 9e-5$ ) than  
79 between the offspring's autozygosity and their own EA ( $p = 0.045$ ). This negative association  
80 between parental EA and offspring autozygosity was entirely mediated by the distance between  
81 parental birthplaces, with evidence to suggest that more highly educated parents tended to be  
82 more mobile on average and thus less likely to mate with an individual who shares a distant  
83 common ancestor, potentially inducing  $F_{ROH} \sim$  trait associations that are due to sociological  
84 factors rather than reflecting a true effect of inbreeding depression.

85 The Adolescent Brain Cognitive Development Study<sup>SM</sup> (ABCD Study<sup>®</sup>) is a large,  
86 longitudinal study with genetic and phenotypic data available for approximately 11,000  
87 adolescents, as well as limited phenotypic data on their parents. The baseline sample includes  
88 children who were 9-11 years old in 2016-2017, and their parents. As such, this sample  
89 provides us an opportunity to examine (1) the distribution of autozygosity in a contemporary  
90 North American sample and (2) whether increased autozygosity is associated with decreased  
91 cognitive ability and parental EA.

92

## 93 **Methods**

### 94 Preregistration

95 We preregistered our analysis ([osf.io/eqkty](https://osf.io/eqkty)). Data and analyses presented in this  
96 manuscript closely resemble those described in the preregistration; any exceptions are  
97 described here. First, while we perform analyses separately for genetically confirmed non-  
98 Hispanic European ancestry and non-Hispanic African ancestry samples, we eventually chose  
99 to meta-analyze across ancestry groups. Deviations in sample sizes reflect a better  
100 understanding of the information available for each individual as we began implementing the  
101 analyses in the data. We also recoded the parental EA measure using codes different from

102 those in the preregistration so that our measure of EA might more closely resemble that used by  
103 Abdellaoui et al. (2015). Lastly, we included additional sensitivity analyses not described in the  
104 preregistration which are strictly exploratory and can be found in the Supplementary Note.

105

## 106 Sample

107 This study used genetic and phenotypic data from the ABCD study version 3.0, a long-  
108 term study of brain development through adolescence in over 11,000 children (Jernigan et al.,  
109 2018). Data were initially collected in children ages 9-10 across 21 sites and have subsequently  
110 been collected each year. Genetic samples were collected from the children in addition to  
111 demographic and phenotypic data on both the children and their parents.

112 Using a combination of self-report race and ethnicity and genetic principal component  
113 analysis (PCA), we separated the 11,875 ABCD Study participants into a predominantly  
114 European genetic ancestry subset (N = 5,556) and predominantly African genetic ancestry  
115 subset (N = 1,584), to account for differences in allele frequencies and linkage disequilibrium  
116 across populations (see *Genotypic Data Cleaning*), which can lead to differences in mean  $F_{ROH}$   
117 across ancestry groups. We then called runs of homozygosity (ROHs) and estimated  $F_{ROH}$  (the  
118 proportion of the genome contained in ROHs) for the PCA-selected European- and African-  
119 ancestry individuals separately (see *ROH Calling*). To maximize sample size in each analysis,  
120 we included any individual if data for the necessary variables (outcome and covariates) were  
121 available. For example, if EA data were available for an individual's mother but not father, that  
122 individual was included in the test for an association between child's  $F_{ROH}$  and maternal EA, but  
123 excluded from the sample used to test for an association between child's  $F_{ROH}$  and paternal EA.  
124 As such, Ns varied depending on data availability for each individual and specific Ns are defined  
125 for each analysis in Table S1.

126

## 127 Phenotypes

128 Parental EA was measured using the question “What is the highest grade or level of  
129 school you have completed or the highest degree you have received?” This field was only  
130 considered for individuals for whom we could confirm that the answer was for the biological  
131 parent of the child. To approximate the coding for EA in Abdellaoui et al., responses were  
132 recoded into the three categories: (1) Completed High school, GED or less: included individuals  
133 who reported never attending kindergarten or that they completed a grade between first and  
134 12th, High school, a GED or equivalent diploma; (2) Completed higher education up to  
135 Bachelor’s Degree: included individuals who reported completing some college, an occupational  
136 Associate degree, an academic Associate degree or a Bachelor’s degree; and (3) Completed  
137 Master’s or Doctoral degree: included individuals who reported completing a Master’s or  
138 Doctoral degree.

139 Given the age of the children (current ages ranging from 14-15) in the study, the above  
140 definitions of EA were not applicable to the ABCD Study child subjects. Although EA is a multi-  
141 faceted construct, there is substantial evidence for a strong correlation between educational  
142 achievement and cognitive ability (Deary et al., 2007; Kaufman et al., 2009; Lynn & Meisenberg,  
143 2010; Strenze, 2007), and previous studies have identified significant associations between  
144  $F_{ROH}$  and cognitive ability (Clark et al., 2019; Howrigan et al., 2016; Johnson et al., 2018; Yengo  
145 et al., 2017); therefore, we also examined the association between  $F_{ROH}$  and the child’s  
146 cognitive ability, measured by their Overall Cognition Composite Score (Akshoomoff et al.,  
147 2013; Weintraub et al., 2013). We chose to use the score uncorrected for age, as age was  
148 already included as a covariate in our model (see *Statistical Analysis*).

149

#### 150 Genotypic data cleaning

151 We used the Rapid Imputation and COmputational PipeLine for Genome-Wide  
152 Association Studies (RICOPILI; Lam et al., 2020) to perform quality control (QC) on the 11,099  
153 individuals with available ABCD Study phase 3 genotypic data, using RICOPILI’s default

154 parameters. The 10,585 individuals who passed QC checks were then matched to broad self-  
155 report racial groups using the ABCD Study parent survey. There were 6,787 individuals for  
156 whom their parents/caregivers indicated the child's race was only "white", and 5,561 of those  
157 individuals did not endorse any Hispanic ethnicity/origin. We also identified 1,675 individuals for  
158 whom their parents/caregivers indicated the child's race was only "black", and 1,584 of those  
159 individuals did not endorse any Hispanic ethnicity/origin. After performing a second round of QC  
160 on these sub-samples, 5,556 non-Hispanic White and 1,584 non-Hispanic Black individuals  
161 were retained in the analyses. Principal component analysis (PCA) in RICOPIII (Lam et al.,  
162 2020) was used to confirm the genetic ancestry of these individuals by mapping onto the 1000  
163 Genomes reference panel (Auton et al., 2015), resulting in PCA-selected European- and  
164 African-ancestry subsets.

165

#### 166 Statistical analysis

167 Statistical analyses consisting of ROH calling,  $F_{ROH}$  estimation and association testing  
168 were performed separately for the PCA-selected European- and African-ancestry subsets.  
169 Results of association tests were then meta-analyzed across the two ancestry groups using a  
170 fixed-effect model implemented with the "metafor" package in R (Viechtbauer, 2010). We first  
171 tested for heterogeneity using a random-effects model for each meta-analysis; however, tests  
172 for heterogeneity were non-significant ( $p > 0.05$ ), thus we chose to use fixed-effect models over  
173 random-effect models. We report the meta-analysis results as the main findings.

174

#### 175 *ROH calling*

176 Following the procedures of previous studies (Clark et al., 2019), we cleaned the data  
177 further using PLINK 1.9 (Chang et al., 2015), excluding SNPs with > 3% missingness or a MAF  
178 < 5 % and excluding individuals with > 3% missing data. After QC, 288,246 SNPs remained for  
179 the EUR sample and 278,639 SNPs remained for the AFR sample.

180 We called ROHs using PLINK 1.9 (Chang et al., 2015), following the approach taken in  
181 Abdellaoui et al. (2015) and the recommendations of Howrigan et al. (2011). We first pruned  
182 SNPs for LD (window size = 50, number of SNPs to shift after each step = 5, based on a  
183 variance inflation factor [VIF] of 2) using the following parameters in PLINK 1.9: --indep 50 5 2.  
184 After LD pruning, 93,952 and 136,164 SNPs were left for analysis of the EUR and AFR  
185 samples, respectively. Next, we defined an ROH as  $\geq 65$  consecutive homozygous SNPs, with  
186 no heterozygote calls allowed using the following PLINK code: --homozyg-window-het 0 --  
187 homozyg-snp 65 --homozyg-gap 500 --homozyg-density 200.

188 We also called ROHs using the method presented by Clark et al. (2019), which differs  
189 not only in the ROH calling procedure, but also in that there is no initial LD pruning. To call  
190 ROHs we used the following parameters in PLINK 1.9: --homozyg-window-snp 50; --homozyg-  
191 snp 50; --homozyg-kb 1500; --homozyg-gap 1000; --homozyg-density 50; --homozyg-window-  
192 missing 5; homozyg-window-het 1. Results using this method are presented in the  
193 Supplementary Note.

194

#### 195 *F<sub>ROH</sub> calculation and association analysis*

196  $F_{ROH}$  was calculated as the total length of ROHs summed for each individual, and then  
197 divided by the total SNP-mappable autosomal distance ( $2.77 \times 10^6$  kilobases). We used mixed  
198 effect regression models to test the association between (1) child's  $F_{ROH}$  and child's cognitive  
199 ability and (2) child's  $F_{ROH}$  and parental EA (both maternal and paternal EA, separately). In each  
200 linear regression model, child's  $F_{ROH}$  was the outcome variable and cognitive ability, maternal  
201 EA or paternal EA was included as a predictor variable. To account for the non-normal  
202 distribution of  $F_{ROH}$ , we calculated empirical p-values using a permutation procedure (as in  
203 Abdellaoui et al.) implemented in the permlmer package (Lee & Braun, 2012) in R and ran  
204 10,000 permutations to calculate an empirical p-value for each model. All empirical p-values  
205 were nearly identical to observed p-values in the original models; thus, we meta-analyzed the

206 original effect sizes. Each model included the following covariates: child's age, child's biological  
207 sex, genotyping batch, testing site, family ID, and the first ten ancestry PCs. Testing site and  
208 family ID were modeled as random intercepts and all other covariates were fixed. We also  
209 performed a test for association between child's  $F_{ROH}$  and child's cognitive ability while  
210 accounting for maternal and paternal EA as additional covariates.

211

## 212 **Results**

### 213 Descriptive statistics

214 We called ROHs and estimated  $F_{ROH}$  in 5,556 PCA-selected European-ancestry  
215 individuals and 1,584 PCA-selected African-ancestry individuals (7,140 individuals total). The  
216 extent of inbreeding in the ABCD sample overall was quite low, with an average  $F_{ROH}$  of 0.00052  
217 (SD = 0.00378), minimum  $F_{ROH}$  of 0 (6,081 individuals had zero ROHs) and maximum  $F_{ROH}$  of  
218 0.077. We also computed the number of ROH segments, with the number of ROHs in each  
219 individual ranging from 0 to 26 and averaging at 0.234. The average total amount of ROH —  
220 that is, the combined length of all ROH segments — was 1.43 MB. Ancestry-specific estimates  
221 are available in the Supplementary Note. For descriptive statistics from child cognition and  
222 parental EA please see Table S2.

223

### 224 Autozygosity, educational attainment, and cognitive ability in the ABCD Study sample

#### 225 *Association between child cognitive ability and child $F_{ROH}$*

226 Of the 7,140 individuals with ROH calls,  $F_{ROH}$  estimates, and information on covariates,  
227 data on child cognitive ability were available for 6,504 individuals. Child cognitive ability was  
228 negatively associated with  $F_{ROH}$  in the primary meta-analysis across ancestry groups  
229 (standardized beta = -0.032, standard error = 0.014,  $p = 0.022$ ). Results were similar when  
230 inbreeding outliers ( $F_{ROH} > 0.0156$ ) were excluded, with the meta-analysis showing a negative  
231 association between child cognitive ability and  $F_{ROH}$  (standardized beta = -0.032, standard error

232 = 0.013,  $p = 0.014$ ). In general, both the PCA-selected European- and African-ancestry  
233 subsamples showed consistent direction of effect, but standard errors were larger in the much  
234 smaller PCA-selected African-ancestry subset (all results provided in Table 1). Using the ROH  
235 calling method from Clark et al. (2019), we also detected a negative association between child  
236 cognitive ability and  $F_{ROH}$  (see Supplementary Note). We also tested the association between  
237 child cognitive ability and  $F_{ROH}$  while accounting for both maternal and paternal EA in 3,983  
238 individuals who had data for all three phenotypes, and found that the effect size was identical to  
239 the analysis where we did not control for parental EA, although the standard error increased  
240 (standardized beta = -0.032, standard error = 0.017,  $p = 0.058$ ).

#### 241 *Associations between parental educational attainment and child $F_{ROH}$*

242 Of the 7,140 individuals with ROH calls,  $F_{ROH}$  estimates, and information on covariates,  
243 data on maternal EA and paternal EA were available for 5,801 and 4,172 individuals,  
244 respectively. In the primary meta-analysis, maternal EA was negatively associated with  $F_{ROH}$ ,  
245 although the association was not statistically significant (standardized beta = -0.02, standard  
246 error = 0.013,  $p = 0.120$ ; after removing inbreeding outliers: beta = -0.012, standard error =  
247 0.014,  $p = 0.402$ ). Similarly, paternal EA was negatively associated with  $F_{ROH}$ , but this  
248 association was not statistically significant (standardized beta = -0.029, standard error = 0.017,  
249  $p = 0.082$ ; after removing inbreeding outliers: standardized beta = -0.007, standard error =  
250 0.017,  $p = 0.679$ ).

251

## 252 **Discussion**

253 In a sample of approximately 7,000 adolescents of PCA-selected European- and African  
254 ancestries, we found a negative association between child  $F_{ROH}$  and child cognitive ability  
255 (standardized beta = -0.032; s.e. = 0.014;  $p = 0.022$ ), replicating previous findings (Abdellaoui et  
256 al., 2015; Howrigan et al., 2016); however, we note that this p-value would not withstand  
257 Bonferroni correction for 3 tests (association tests between  $F_{ROH}$  and cognitive scores, paternal

258 EA, and maternal EA;  $\alpha = 0.0167$ ). Effect sizes were slightly smaller but of similar magnitude in  
259 our study (standardized beta = -0.032; s.e. = 0.014) relative to Abdellaoui et al.'s study  
260 (standardized beta = -0.041; s.e. = 0.024). Notably, the negative association we identified  
261 between child  $F_{ROH}$  and child cognitive ability was of similar magnitude when maternal and  
262 paternal EA were included as covariates in the model.

263 While several previous studies suggest that a negative association between cognitive  
264 ability and  $F_{ROH}$  may indicate inbreeding depression on cognitive ability (Howrigan et al., 2016),  
265 Abdellaoui et al. suggested that their findings were the result of individuals with lower EA being  
266 less likely to migrate and more likely to mate with others who are also less educated and less  
267 mobile, leading to parents having more similar genetic backgrounds on average and their child  
268 therefore displaying more autozygosity while also being genetically predisposed to lower  
269 educational attainment. In support of this hypothesis, they found significant associations  
270 between child  $F_{ROH}$  and both maternal EA (standardized beta = -0.080; s.e. = 0.021) and  
271 paternal EA (standardized beta = -0.089; s.e. = 0.022) that were stronger than the association  
272 between  $F_{ROH}$  and the child's own EA (standardized beta = -0.041; s.e. = 0.024). However, not  
273 only do we find that our parent EA-child  $F_{ROH}$  associations are significantly weaker (yet still in  
274 the same direction of effect) compared to the parent EA-child  $F_{ROH}$  associations found in  
275 Abdellaoui et al., but in our sample, child  $F_{ROH}$  is more strongly associated with child cognitive  
276 ability (standardized beta = -0.032; s.e. = 0.014) than either maternal EA (standardized beta = -  
277 0.020; s.e. = 0.013) or paternal EA (standardized beta = -0.029; s.e. = 0.017).

278 While we do not rule out lack of power as a contributing factor (Keller et al., 2011), we  
279 deem it unlikely to be the sole explanation for our weaker results for parental EA measures, as  
280 the current sample size was large ( $N \sim 7,000$ ) relative to Abdellaoui et al.'s study ( $N \sim 2,000$ ),  
281 which found a highly significant association between  $F_{ROH}$  and both maternal and paternal EA.  
282 Given the smallest reported effect size in Abdellaoui et al.'s study (standardized beta = -0.041,  
283 s.e. = 0.024) and the reported  $N = 2,007$ , we estimate that we would have 84% power to detect

284 an effect of the same size in our sample of 5,181 European ancestry individuals, given that the  
285 standard deviation of  $F_{ROH}$  is very similar across the two studies: 0.0031 in our European-  
286 ancestry subset vs. 0.003 in Abdellaoui et al. Below, we consider other possible explanations for  
287 our differing results.

288 Notably, the current sample and the sample used in Abdellaoui et al., 2015 were derived  
289 from two different countries (the United States and the Netherlands, respectively), which bear  
290 varying degrees of resemblance in terms of cultural, social, and economic contexts. The  
291 possible influence of these differences across countries are evident in previous studies which  
292 have found opposite directions of associations between autozygosity and various phenotypes.  
293 For example, previous research has identified a negative association between  $F_{ROH}$  and EA in a  
294 Dutch population (Abdellaoui et al., 2015) and cognitive ability in a broader European population  
295 (Howrigan et al., 2016), and oppositely, a positive association between  $F_{ROH}$  and cognitive  
296 ability in both an American sample (Córdova-Palomera et al., 2018) and a UK sample (Power et  
297 al., 2014). We consider that the results of our current study, which uses a contemporary  
298 American sample, may differ from previous findings partly as a result of the sample's  
299 demographics.

300 An important aspect of the Abdellaoui et al. study is the discovery that migration is a  
301 significant mediator in the relationship between parental EA and child's  $F_{ROH}$ . Individuals with  
302 higher EA on average had traveled a greater distance between their birthplace and their  
303 spouse's birthplace, as well as between their birthplace and their child's birthplace (Abdellaoui  
304 et al., 2015). That is to say, EA and mobility were positively associated, resulting in individuals  
305 with higher EA being somewhat more likely to mate with more genetically dissimilar individuals  
306 on average. As a result, the offspring of individuals with higher EA may be more outbred as well  
307 as inheriting a predisposition for higher EA. In support of this theory, Abdellaoui et al. found that  
308 the association between parental EA and child's  $F_{ROH}$  was fully mediated by the distance  
309 between maternal and paternal birthplace, although birthplaces for both offspring and parents

310 only included locations within the Netherlands. While the Abdellaoui et al. study only considered  
311 internal migration, the ABCD sample includes children born to individuals who may have  
312 migrated internationally, not just within the same country, as parents in the ABCD study born in  
313 a wide variety of places, which range from the United States (data on exact location not  
314 provided) to countries like Mexico and Yemen. We did not have information available on city or  
315 state-specific places of birth, leaving us unable to investigate the relationships between EA,  
316 mobility, and  $F_{ROH}$  in our sample. While the impact of migration and its relationships with  $F_{ROH}$   
317 and EA were potentially more straightforward and interpretable in the context of domestic  
318 migration in the Netherlands, complicated political and historical contexts which influence  
319 international migration and differ country to country likely produce variable relationships  
320 between EA and autozygosity, and the lack of state- or even region-specific data limit our ability  
321 to draw conclusions and comparisons in the ABCD data.

322         Incidentally, we found very low levels of autozygosity in the ABCD sample compared to  
323 previous studies. Whereas the variance of  $F_{ROH}$  was similar to that of previous studies, the mean  
324  $F_{ROH}$  observed in the current study ( $F_{ROH} = 0.0005$ ) was much lower than that observed in  
325 Abdellaoui et al. ( $F_{ROH} = 0.0016$ ), Howrigan et al. ( $F_{ROH} = 0.0041$ ) and Power et al. ( $F_{ROH} =$   
326  $0.007$ ). While the mean  $F_{ROH}$  in a sample is not immediately pertinent to the statistical power to  
327 detect associations between  $F_{ROH}$  and complex traits, we suspect that generational differences  
328 in mean  $F_{ROH}$  may still be relevant to the findings of this and other studies which examine  $F_{ROH}$ .  
329 The participants of the ABCD study were primarily born between 2006 and 2007, with the  
330 median birth year of *parents* of ABCD individuals being 1976, compared to Abdellaoui et al.'s  
331 study in which two-thirds of the offspring studied were born in 1984 or earlier. To our  
332 knowledge, there are few ROH studies that have included young (birth year > 1990) United  
333 States samples, but one study of 809 North Americans of European descent aged 19-99 years  
334 old found that ROH significantly decreased in size and frequency as chronological age  
335 decreased; furthermore, the authors predicted a decline in percent  $F_{ROH}$  of  $\sim 0.1$  for every 20

336 years' difference in birth year (Nalls et al., 2009). Given that the ABCD participants are around  
337 20 years younger than the subjects in Abdellaoui et al., and the average percent  $F_{ROH}$  in  
338 Abdellaoui et al.'s sample was  $\sim 0.16$ , we might expect the average percent  $F_{ROH}$  in ABCD to be  
339  $\sim 0.06$ , or an average  $F_{ROH}$  of 0.0006; this is similar to the observed average  $F_{ROH}$  of 0.0005.

340 We conducted our own assessment of this phenomenon by comparing several  
341 generations within another North American sample (the Collaborative Study on the Genetics of  
342 Alcoholism (COGA) (Begleiter et al., 1995)) to assess differences in autozygosity over time. In  
343 the youngest generation, which included individuals born after 1990 (the youngest individual in  
344 this sample was born in 2003), the average  $F_{ROH}$  was 0.0002 (s.e. =  $3.2e-5$ ), while the average  
345  $F_{ROH}$  calculated in older generations were 0.0003 (s.e. =  $2.6e-5$ ), 0.0007 (s.e. =  $1.1e-4$ ), 0.0008  
346 (s.e. =  $1.4e-4$ ), 0.0010 (s.e. =  $2.8e-4$ ) and 0.0034 (s.e. =  $3.4e-3$ ) for those born between 1970-  
347 1990, 1950-1970, 1930-1950, 1910-1930 and 1890-1910, respectively (Table S3). We also ran  
348 a linear mixed model which further confirmed a significant effect of birth year on  $F_{ROH}$  (beta = -  
349 0.071, s.e. = 0.011,  $p = 4.3e-11$ ). Furthermore, we compared two cohorts from similar  
350 geographic regions in Howrigan et al.'s 2016 study to assess differences in autozygosity  
351 according to generation in a UK sample, to see if the pattern held across cultures. In the young  
352 (average age=11.67 years old) GAIN UK cohort, the average  $F_{ROH}$  was 0.0019, while the  
353 average  $F_{ROH}$  calculated in the older English MANC cohort (average age = 64.9 years old) was  
354 0.0047 (from Tables 1 and 2 in Howrigan et al.).

355 Therefore, we hypothesize that year of birth may be impacting  $F_{ROH}$  estimates across  
356 studies; given the exponential increases in population size and urbanization (Bongaarts, 2009)  
357 as well as a decline in racial and religious endogamy (Kalmijn, 1991; Luo, 2017; Rosenfeld,  
358 2008) both globally and in the US, all of these factors may be contributing to decreasing levels  
359 of inbreeding over time (Bittles & Black, 2010; Campbell et al., 2009; Nalls et al., 2009). Thus,  
360 the generational difference between our study sample, ABCD, and those of previous ROH  
361 studies may partly explain the lower levels of autozygosity observed in the current study. The

362 ABCD sample was genotyped on the Smokescreen array (Baurley et al., 2016), which is built on  
363 an Affymetrix backbone with additional addiction-focused content. As Abdellaoui et al.'s sample  
364 was genotyped on the Affymetrix 6.0 array, and we followed identical genotyping QC and ROH  
365 calling procedures, it seems unlikely that differences in SNP panel or calling algorithms are  
366 responsible for the lower levels of autozygosity observed in our study.

367 In summary, we found a negative association between estimated autozygosity and child  
368 cognitive ability, such that individuals with lower estimates of  $F_{ROH}$  tended to have higher levels  
369 of cognitive ability, replicating previous findings. On the other hand, we found weaker  
370 associations between  $F_{ROH}$  and maternal EA or paternal EA, although findings were generally in  
371 the expected, negative direction of effect. We hypothesize that these mixed results are due to a  
372 combination of generational differences in autozygosity and the complex mechanisms which  
373 influence both EA and mobility in different countries. Future studies should carefully  
374 characterize and consider how the effects of assortative mating, migration patterns, and  
375 generational differences in the distribution of  $F_{ROH}$  may influence autozygosity-trait associations  
376 across samples.

377

### 378 **Acknowledgements**

379 We thank Sarah Paul for her help with phenotype curation.

380 Data used in the preparation of this article were obtained from the Adolescent Brain  
381 Cognitive Development<sup>SM</sup> (ABCD) Study (<https://abcdstudy.org>), held in the NIMH Data Archive  
382 (NDA). This is a multisite, longitudinal study designed to recruit more than 10,000 children age  
383 9-10 and follow them over 10 years into early adulthood. The ABCD Study® is supported by the  
384 National Institutes of Health and additional federal partners under award numbers  
385 U01DA041048, U01DA050989, U01DA051016, U01DA041022, U01DA051018, U01DA051037,  
386 U01DA050987, U01DA041174, U01DA041106, U01DA041117, U01DA041028, U01DA041134,  
387 U01DA050988, U01DA051039, U01DA041156, U01DA041025, U01DA041120, U01DA051038,

388 U01DA041148, U01DA041093, U01DA041089, U24DA041123, U24DA041147. A full list of  
389 supporters is available at <https://abcdstudy.org/federal-partners.html>. A listing of participating  
390 sites and a complete listing of the study investigators can be found at  
391 [https://abcdstudy.org/consortium\\_members/](https://abcdstudy.org/consortium_members/). ABCD consortium investigators designed and  
392 implemented the study and/or provided data but did not necessarily participate in the analysis or  
393 writing of this report. This manuscript reflects the views of the authors and may not reflect the  
394 opinions or views of the NIH or ABCD consortium investigators.

395 We also thank the Collaborative Study on the Genetics of Alcoholism for generously  
396 allowing us to include an analysis of their data in this manuscript. The Collaborative Study on the  
397 Genetics of Alcoholism (COGA), Principal Investigators B. Porjesz, V. Hesselbrock, T. Foroud;  
398 Scientific Director, A. Agrawal; Translational Director, D. Dick, includes eleven different centers:  
399 University of Connecticut (V. Hesselbrock); Indiana University (H.J. Edenberg, T. Foroud, Y. Liu,  
400 M. Plawecki); University of Iowa Carver College of Medicine (S. Kuperman, J. Kramer); SUNY  
401 Downstate Health Sciences University (B. Porjesz, J. Meyers, C. Kamarajan, A. Pandey);  
402 Washington University in St. Louis (L. Bierut, J. Rice, K. Bucholz, A. Agrawal); University of  
403 California at San Diego (M. Schuckit); Rutgers University (J. Tischfield, R. Hart, J. Salvatore); The  
404 Children's Hospital of Philadelphia, University of Pennsylvania (L. Almasy); Virginia  
405 Commonwealth University (D. Dick); Icahn School of Medicine at Mount Sinai (A. Goate, P.  
406 Slesinger); and Howard University (D. Scott). Other COGA collaborators include: L. Bauer  
407 (University of Connecticut); J. Nurnberger Jr., L. Wetherill, X., Xuei, D. Lai, S. O'Connor, (Indiana  
408 University); G. Chan (University of Iowa; University of Connecticut); D.B. Chorlian, J. Zhang, P.  
409 Barr, S. Kinreich, G. Pandey (SUNY Downstate); N. Mullins (Icahn School of Medicine at Mount  
410 Sinai); A. Anokhin, S. Hartz, E. Johnson, V. McCutcheon, S. Saccone (Washington University);  
411 J. Moore, Z. Pang, S. Kuo (Rutgers University); A. Merikangas (The Children's Hospital of  
412 Philadelphia and University of Pennsylvania); F. Aliev (Virginia Commonwealth University); H.

413 Chin and A. Parsian are the NIAAA Staff Collaborators. We continue to be inspired by our  
414 memories of Henri Begleiter and Theodore Reich, founding PI and Co-PI of COGA, and also owe  
415 a debt of gratitude to other past organizers of COGA, including Ting- Kai Li, P. Michael Conneally,  
416 Raymond Crowe, and Wendy Reich, for their critical contributions. This national collaborative  
417 study is supported by NIH Grant U10AA008401 from the National Institute on Alcohol Abuse and  
418 Alcoholism (NIAAA) and the National Institute on Drug Abuse (NIDA).

#### 419 **Declarations**

420 Funding: K01DA051759 (ECJ), K02DA032573 (AA), MH109532 (SMCC)

421 Conflicts of interest: The authors report no conflicts of interest to disclose.

422 Ethics approval: This study was approved by the local Institutional Review Board.

423 Consent to participate: All participants in ABCD provided informed consent (or assent).

424 Consent for publication: Not applicable

425 Availability of data and material: Genetic and phenotypic data in the ABCD sample are available  
426 for download for approved researchers from the NIMH Data Archive.

427 Author contributions: Study design and conception were developed by Sarah MC Colbert and  
428 Emma C Johnson, with input from Matthew C Keller. Data cleaning and preparation and  
429 statistical analyses were performed by Sarah MC Colbert. Analyses were supervised by Arpana  
430 Agrawal and Emma C Johnson. All authors participated in critical discussion of the results. The  
431 manuscript draft was written, edited, and approved by all authors.

432

## 433 References

- 434 Abdellaoui, A., Hottenga, J. J., Willemsen, G., Bartels, M., Van Beijsterveldt, T., Ehli, E. A.,  
435 Davies, G. E., Brooks, A., Sullivan, P. F., Penninx, B. W. J. H., De Geus, E. J., &  
436 Boomsma, D. I. (2015). Educational attainment influences levels of homozygosity through  
437 migration and assortative mating. *PLoS ONE*, *10*(3), 1–14.  
438 <https://doi.org/10.1371/journal.pone.0118935>
- 439 Abdellaoui, A., Hottenga, J. J., Xiao, X., Scheet, P., Ehli, E. A., Davies, G. E., Hudziak, J. J.,  
440 Smit, D. J. A., Bartels, M., Willemsen, G., Brooks, A., Sullivan, P. F., Smit, J. H., De Geus,  
441 E. J., Penninx, B. W. J. H., & Boomsma, D. I. (2013). Association between autozygosity  
442 and major depression: Stratification due to religious assortment. *Behavior Genetics*, *43*(6).  
443 <https://doi.org/10.1007/s10519-013-9610-1>
- 444 Akshoomoff, N., Beaumont, J. L., Bauer, P. J., Dikmen, S. S., Gershon, R. C., Mungas, D.,  
445 Slotkin, J., Tulsky, D., Weintraub, S., Zelazo, P. D., & Heaton, R. K. (2013). NIH toolbox  
446 cognition battery (CB): Composite scores of crystallized, fluid, and overall cognition.  
447 *Monographs of the Society for Research in Child Development*, *78*(4).  
448 <https://doi.org/10.1111/mono.12038>
- 449 Auton, A., Abecasis, G. R., Altshuler, D. M., Durbin, R. M., Bentley, D. R., Chakravarti, A., Clark,  
450 A. G., Donnelly, P., Eichler, E. E., Flück, P., Gabriel, S. B., Gibbs, R. A., Green, E. D.,  
451 Hurles, M. E., Knoppers, B. M., Korbel, J. O., Lander, E. S., Lee, C., Lehrach, H., ...  
452 Schloss, J. A. (2015). A global reference for human genetic variation. In *Nature* (Vol. 526,  
453 Issue 7571). <https://doi.org/10.1038/nature15393>
- 454 Baurley, J. W., Edlund, C. K., Pardamean, C. I., Conti, D. V., & Bergen, A. W. (2016).  
455 Smokescreen: A targeted genotyping array for addiction research. *BMC Genomics*, *17*(1).  
456 <https://doi.org/10.1186/s12864-016-2495-7>
- 457 Begleiter, H., Reich, T., Hesselbrock, V., Porjesz, B., Li, T.-K., Schuckit, M. A., Edenberg, H. J.,  
458 & Rice, J. P. (1995). The collaborative study on the genetics of alcoholism: An update.  
459 *Alcohol Research and Health*, *19*(3), 228–236.
- 460 Bittles, A. H., & Black, M. L. (2010). Consanguinity, human evolution, and complex diseases.  
461 *Proceedings of the National Academy of Sciences of the United States of America*,  
462 *107*(SUPPL. 1). <https://doi.org/10.1073/pnas.0906079106>
- 463 Bongaarts, J. (2009). Human population growth and the demographic transition. *Philosophical*  
464 *Transactions of the Royal Society B: Biological Sciences*, *364*(1532).  
465 <https://doi.org/10.1098/rstb.2009.0137>
- 466 Campbell, H., Rudan, I., Bittles, A. H., & Wright, A. F. (2009). Human population structure,  
467 genome autozygosity and human health. In *Genome Medicine* (Vol. 1, Issue 9).  
468 <https://doi.org/10.1186/gm91>
- 469 Chang, C. C., Chow, C. C., Tellier, L. C. A. M., Vattikuti, S., Purcell, S. M., & Lee, J. J. (2015).  
470 Second-generation PLINK: Rising to the challenge of larger and richer datasets.  
471 *GigaScience*, *4*(1), s13742-015. <https://doi.org/10.1186/s13742-015-0047-8>
- 472 Clark, D. W., Okada, Y., Moore, K. H. S., Mason, D., Pirastu, N., Gandin, I., Mattsson, H.,  
473 Barnes, C. L. K., Lin, K., Zhao, J. H., Deelen, P., Rohde, R., Schurmann, C., Guo, X.,  
474 Giulianini, F., Zhang, W., Medina-Gomez, C., Karlsson, R., Bao, Y., ... Wilson, J. F. (2019).  
475 Associations of autozygosity with a broad range of human phenotypes. *Nature*  
476 *Communications*, *10*(1). <https://doi.org/10.1038/s41467-019-12283-6>
- 477 Córdova-Palomera, A., Kaufmann, T., Bettella, F., Wang, Y., Doan, N. T., Van Der Meer, D.,  
478 Alnæs, D., Rokicki, J., Moberget, T., Søndersby, I. E., Andreassen, O. A., & Westlye, L. T.  
479 (2018). Effects of autozygosity and schizophrenia polygenic risk on cognitive and brain  
480 developmental trajectories. *European Journal of Human Genetics*, *26*(7).  
481 <https://doi.org/10.1038/s41431-018-0134-2>
- 482 Deary, I. J., Strand, S., Smith, P., & Fernandes, C. (2007). Intelligence and educational

- 483 achievement. *Intelligence*, 35(1). <https://doi.org/10.1016/j.intell.2006.02.001>
- 484 Howrigan, D. P., Simonson, M. A., Davies, G., Harris, S. E., Tenesa, A., Starr, J. M., Liewald, D.  
485 C., Deary, I. J., McRae, A., Wright, M. J., Montgomery, G. W., Hansell, N., Martin, N. G.,  
486 Payton, A., Horan, M., Ollier, W. E., Abdellaoui, A., Boomsma, D. I., DeRosse, P., ...  
487 Keller, M. C. (2016). Genome-wide autozygosity is associated with lower general cognitive  
488 ability. *Molecular Psychiatry*, 21(6). <https://doi.org/10.1038/mp.2015.120>
- 489 Jernigan, T. L., Brown, S. A., & Dowling, G. J. (2018). The Adolescent Brain Cognitive  
490 Development Study. In *Journal of Research on Adolescence* (Vol. 28, Issue 1).  
491 <https://doi.org/10.1111/jora.12374>
- 492 Johnson, E. C., Bjelland, D. W., Howrigan, D. P., Abdellaoui, A., Breen, G., Borglum, A.,  
493 Cichon, S., Degenhardt, F., Forstner, A. J., Frank, J., Genovese, G., Heilmann-Heimbach,  
494 S., Herms, S., Hoffman, P., Maier, W., Mattheisen, M., Morris, D. W., Mowry, B., Müller-  
495 Mhysok, B., ... Keller, M. C. (2016). No Reliable Association between Runs of  
496 Homozygosity and Schizophrenia in a Well-Powered Replication Study. *PLoS Genetics*,  
497 12(10). <https://doi.org/10.1371/journal.pgen.1006343>
- 498 Johnson, E. C., Evans, L. M., & Keller, M. C. (2018). Relationships between estimated  
499 autozygosity and complex traits in the UK Biobank. *PLoS Genetics*, 14(7).  
500 <https://doi.org/10.1371/journal.pgen.1007556>
- 501 Joshi, P. K., Esko, T., Mattsson, H., Eklund, N., Gandin, I., Nütle, T., Jackson, A. U.,  
502 Schurmann, C., Smith, A. V., Zhang, W., Okada, Y., Stančáková, A., Faul, J. D., Zhao, W.,  
503 Bartz, T. M., Concas, M. P., Franceschini, N., Enroth, S., Vitart, V., ... Wilson, J. F. (2015).  
504 Directional dominance on stature and cognition in diverse human populations. *Nature*,  
505 523(7561). <https://doi.org/10.1038/nature14618>
- 506 Kalmijn, M. (1991). Shifting Boundaries: Trends in Religious and Educational Homogamy.  
507 *American Sociological Review*, 56(6). <https://doi.org/10.2307/2096256>
- 508 Kaufman, A. S., Kaufman, J. C., Liu, X., & Johnson, C. K. (2009). How do educational  
509 attainment and gender relate to fluid intelligence, crystallized intelligence, and academic  
510 skills at ages 22-90 years? *Archives of Clinical Neuropsychology*, 24(2).  
511 <https://doi.org/10.1093/arclin/acp015>
- 512 Keller, M. C., Simonson, M. A., Ripke, S., Neale, B. M., Gejman, P. V., Howrigan, D. P., Lee, S.  
513 H., Lencz, T., Levinson, D. F., Sullivan, P. F., St Clair, D., Cichon, S., Rietschel, M.,  
514 Nöthen, M. M., Maier, W., Schulze, T. G., Mattheisen, M., Kirov, G. K., O'Donovan, M. C.,  
515 ... Lencz, T. (2012). Runs of homozygosity implicate autozygosity as a schizophrenia risk  
516 factor. *PLoS Genetics*, 8(4). <https://doi.org/10.1371/journal.pgen.1002656>
- 517 Keller, M. C., Visscher, P. M., & Goddard, M. E. (2011). Quantification of inbreeding due to  
518 distant ancestors and its detection using dense single nucleotide polymorphism data.  
519 *Genetics*, 189(1). <https://doi.org/10.1534/genetics.111.130922>
- 520 Lam, M., Awasthi, S., Watson, H. J., Goldstein, J., Panagiotaropoulou, G., Trubetskoy, V.,  
521 Karlsson, R., Frei, O., Fan, C. C., De Witte, W., Mota, N. R., Mullins, N., Brügger, K., Hong  
522 Lee, S., Wray, N. R., Skarabis, N., Huang, H., Neale, B., Daly, M. J., ... Ripke, S. (2020).  
523 RICOPII: Rapid Imputation for COnsortias PIpeLIne. *Bioinformatics*, 36(3).  
524 <https://doi.org/10.1093/bioinformatics/btz633>
- 525 Lee, O. E., & Braun, T. M. (2012). Permutation Tests for Random Effects in Linear Mixed  
526 Models. *Biometrics*, 68(2), 486–493. <https://doi.org/10.1111/j.1541-0420.2011.01675.x>
- 527 Luo, S. (2017). Assortative mating and couple similarity: Patterns, mechanisms, and  
528 consequences. *Social and Personality Psychology Compass*, 11(8).  
529 <https://doi.org/10.1111/spc3.12337>
- 530 Lynn, R., & Meisenberg, G. (2010). National IQs calculated and validated for 108 nations. In  
531 *Intelligence* (Vol. 38, Issue 4). <https://doi.org/10.1016/j.intell.2010.04.007>
- 532 McQuillan, R., Leutenegger, A. L., Abdel-Rahman, R., Franklin, C. S., Pericic, M., Barac-Lauc,  
533 L., Smolej-Narancic, N., Janicijevic, B., Polasek, O., Tenesa, A., MacLeod, A. K.,

534 Farrington, S. M., Rudan, P., Hayward, C., Vitart, V., Rudan, I., Wild, S. H., Dunlop, M. G.,  
535 Wright, A. F., ... Wilson, J. F. (2008). Runs of Homozygosity in European Populations.  
536 *American Journal of Human Genetics*, 83(3). <https://doi.org/10.1016/j.ajhg.2008.08.007>  
537 Nalls, M. A., Simon-Sanchez, J., Gibbs, J. R., Paisan-Ruiz, C., Bras, J. T., Tanaka, T., Matarin,  
538 M., Scholz, S., Weitz, C., Harris, T. B., Ferrucci, L., Hardy, J., & Singleton, A. B. (2009).  
539 Measures of autozygosity in decline: Globalization, urbanization, and its implications for  
540 medical genetics. *PLoS Genetics*, 5(3). <https://doi.org/10.1371/journal.pgen.1000415>  
541 Power, R. A., Nagoshi, C., DeFries, J. C., & Plomin, R. (2014). Genome-wide estimates of  
542 inbreeding in unrelated individuals and their association with cognitive ability. *European*  
543 *Journal of Human Genetics*, 22(3). <https://doi.org/10.1038/ejhg.2013.155>  
544 Rosenfeld, M. J. (2008). Racial, educational and religious endogamy in the united states: A  
545 comparative historical perspective. *Social Forces*, 87(1). <https://doi.org/10.1353/sof.0.0077>  
546 Strenze, T. (2007). Intelligence and socioeconomic success: A meta-analytic review of  
547 longitudinal research. In *Intelligence* (Vol. 35, Issue 5).  
548 <https://doi.org/10.1016/j.intell.2006.09.004>  
549 Viechtbauer, W. (2010). Viechtbauer, W. (2010). Conducting meta-analyses in R with the  
550 metafor package. *Journal of Statistical Software*, 36 (3), 1–48. *Journal of Statistical*  
551 *Software*, 36(3).  
552 Weintraub, S., Dikmen, S. S., Heaton, R. K., Tulsky, D. S., Zelazo, P. D., Bauer, P. J., Carlozzi,  
553 N. E., Slotkin, J., Blitz, D., Wallner-Allen, K., Fox, N. A., Beaumont, J. L., Mungas, D.,  
554 Nowinski, C. J., Richler, J., Deocampo, J. A., Anderson, J. E., Manly, J. J., Borosh, B., ...  
555 Gershon, R. C. (2013). Cognition assessment using the NIH Toolbox. *Neurology*, 80(11  
556 Suppl 3). <https://doi.org/10.1212/wnl.0b013e3182872ded>  
557 Wright, S. (1922). Coefficients of Inbreeding and Relationship. *The American Naturalist*,  
558 56(645). <https://doi.org/10.1086/279872>  
559 Yengo, L., Zhu, Z., Wray, N. R., Weir, B. S., Yang, J., Robinson, M. R., & Visscher, P. M.  
560 (2017). Detection and quantification of inbreeding depression for complex traits from SNP  
561 data. *Proceedings of the National Academy of Sciences of the United States of America*,  
562 114(32). <https://doi.org/10.1073/pnas.1621096114>  
563
